# Supplementary material
Source: publisher figshare collection journal article supplement (https://acs.figshare.com/ndownloader/files/4206721)
Supplement: Supplementary file 1 [file 4206721]

**Figure S1.** Structure of the active site pocket of KsgA WT (green), L114P (yellow) and T4Dam (magenta).
